# Supplementary material
Source: MDPI journal article supplement (https://www.mdpi.com/2073-4441/12/6/1838)
Supplement: s1 [file s1]

## Supplementary material

### Contents

#### Text Sections

**Section S1** SPE process and UPLC-MS/MS analysis of target PPCPs.

**Section S2** DNA extraction and PCR amplification.

#### Figures

**Figure S1** Average pore size of ceramic membrane.

**Figure S2** Average pure water permeability of the conductive membrane.

**Figure S3** Water contact angle of ceramic membrane.

**Figure S4** (a) ROS production in the batch tests ( $n = 3$ ); (b) Concentrations of  $\text{H}_2\text{O}_2$  in CMBR and ECMBR in the batch tests ( $n = 3$ ); (c) Concentrations of  $\text{Cl}_T$  in CMBR and ECMBR in the batch tests ( $n = 3$ ).

#### Tables

**Table S1** physical-chemical properties and molecular structures of target PPCPs.

**Table S2** Operational parameters of tandem MS and LOQs of target PPCPs in wastewater.

**Table S3** Concentrations of PPCPs in influent of EMBR and CMBR.

**Table S4** Richness and diversity estimators of the bacteria phylotypes in the two MBR systems.

### Section S1 SPE process and UPLC-MS/MS analysis of target PPCPs.

Samples were collected using a pre-cleaned 250 mL amber glass bottles, filtered through glass microfiber filters (0.7  $\mu\text{m}$ , Whatman UK), adjusted to pH 3.0 with 40%  $\text{H}_2\text{SO}_4$  (v/v), added with 1 mL 25g/L ascorbic acid, 0.1 g  $\text{Na}_2\text{EDTA}$ , spiked with internal standards (100 ng OLF-D<sub>3</sub>, 100 ng CAF-<sup>13</sup>C<sub>3</sub>, 100 ng SMN-<sup>13</sup>C<sub>6</sub>). HLB cartridge (500 mg/6 mL CNW) were preconditioned by 5 mL MeOH, 5 mL 0.5 mol/L HCl, 5 mL Milli-Q water. Then the sample was extracted at a flow rate of approximately 3 mL/min. Afterwards the cartridge was rinsed by 5 mL 5% (v/v) methanol aqueous, 5 mL Milli-Q water, dried under vacuum for 10 min, eluted by 10 mL MeOH. The eluate was collected with a 10 mL glass tube and dried under a gentle stream of  $\text{N}_2$  in a 40 °C water bath, then reconstructed to 1 mL with 40% methanol aqueous. The resulting extract was filtered through 0.2  $\mu\text{m}$  PES filters for UPLC-MS/MS analysis.

The chromatographic separation of target PPCPs was performed on an Waters I-class ultra-performance liquid chromatography (UPLC) equipped with an Waters BEH-C18 column (100 mm  $\times$  2.1 mm, 1.7  $\mu\text{m}$ ). The column was maintained at 30 °C and the injection volume was 10  $\mu\text{L}$ . Ultrapure water containing 0.1% formic acid (v/v) (A) and MeOH containing 0.1% formic acid (v/v) (B) were used as the mobile phases at a total flow rate of 0.25 mL  $\text{min}^{-1}$ . The elution program was set as 10 % mobile phase A and 90 % mobile phase B in 8 minutes. A Sciex QTrap mass spectrometer (MS), equipped with an electrospray ionization (ESI) source and operated in the positive ion mode, was

employed to analyze the target PPCPs. The MS system was operated under the following conditions: Ionspray Voltage (IS) : 5500; Ion Source Gas1 (GS1) : 50; Collision Gas (CAD) : Medium; Ion Source Gas2 (GS2) : 50; Curtain Gas (CUR) : 20; Temperature (TEM) : 500. For each compound, the fragmentor voltage and product ions are listed in Table S2.

### Section S2 DNA extraction and PCR amplification.

E.Z.N.A.® Soil DNA kit (Omega Bio-Tek, Inc., Norcross, GA, U.S.) were used to extract DNA of the samples and the quality of DNA was assessed using a 1.0 % (w/v) agarose gel electrophoresis. To amplify the 16S rRNA from the samples the following primers were used:338F (5'-ACTCCTACGGGAGGCAGCA-3') and 806R (5'-GGACTACHVGGGTWTCTAAT-3').

Each PCR reaction was conducted in a 20  $\mu$ L reaction volume containing 4  $\mu$ L of 5  $\times$  FastPfu Buffer, 2  $\mu$ L of 2.5 mM dNTPs, 0.8  $\mu$ L of each primer (5  $\mu$ M), 10 ng of template DNA and 0.4  $\mu$ L of FastPfu Polymerase (TransGen AP221-02, Beijing, China). Reactions were carried out on a ABI GeneAmp® System 9700 (Perkin-Elmer Applied Biosystems, Foster City, CA, U.S.) under the following thermocycling steps: 95  $^{\circ}$ C for 2 min, followed by 25 cycles at 95 $^{\circ}$ C for 30 s, 55 $^{\circ}$ C for 30 s and 72  $^{\circ}$ C for 30 s, and a final extension at 72 $^{\circ}$ C for 5 min and 10 $^{\circ}$ C until halted by user. PCR products of three replicates were combined and purified using AxyPrep DNA gel extraction kit and Tris\_HCl for each sample. Amplicons from the two samples were mixed at the equal concentrations.

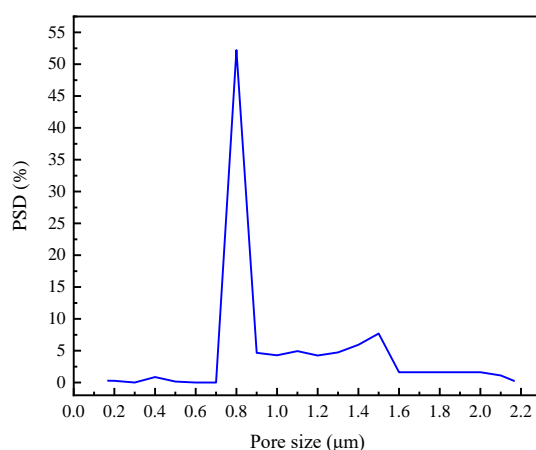

Figure S1. Average pore size of ceramic membrane.

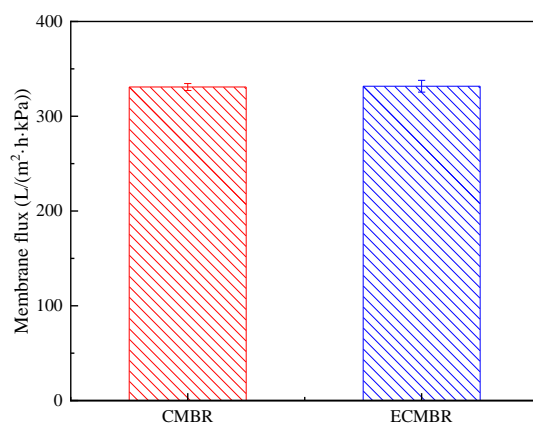

Figure S2. Average pure water permeability of the conductive membrane.

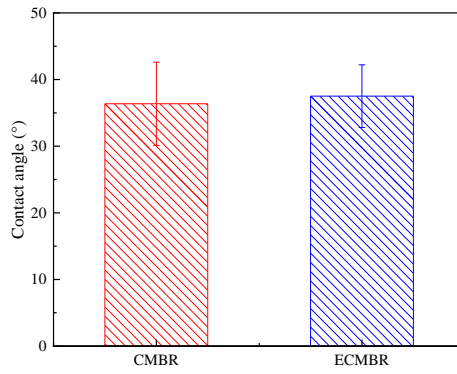

**Figure S3.** Water contact angle of ceramic membrane.

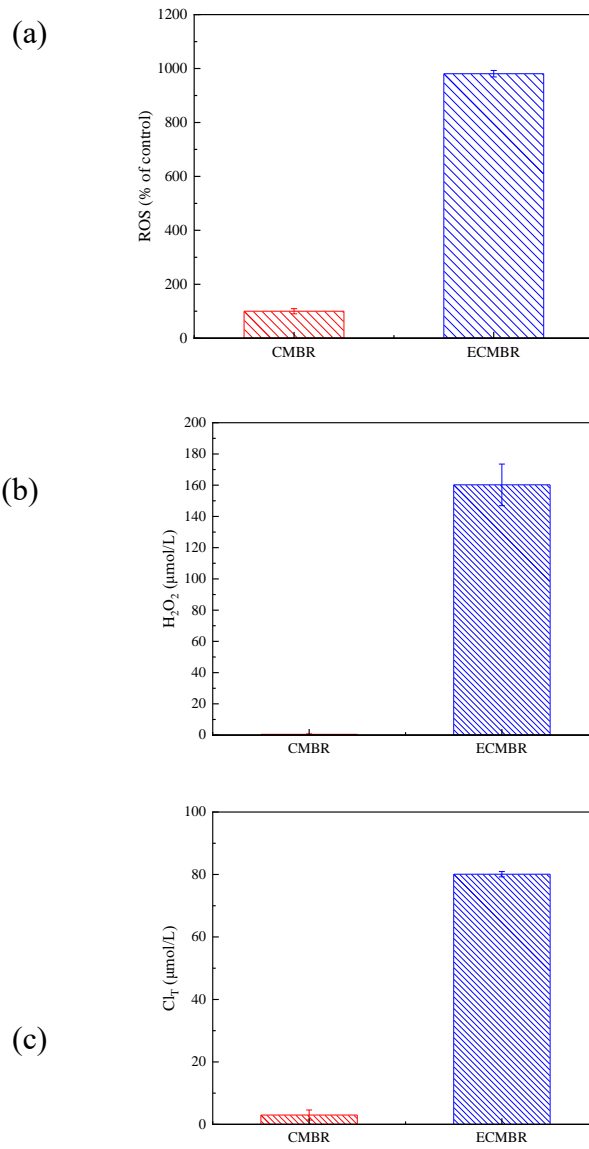

**Figure S4.** (a) ROS production in the batch tests ( $n = 3$ ); (b) Concentrations of H<sub>2</sub>O<sub>2</sub> in CMBR and ECMBR in the batch tests ( $n = 3$ ); (c) Concentrations of Cl<sup>-</sup> in CMBR and ECMBR in the batch tests ( $n = 3$ ).

**Table S1.** physical-chemical properties and molecular structures of target PPCPs.

| Category           | Compound (name/acronym/formula)                                                                        | Chemical Structure                                                                    | CAS No.  | MW     | pK <sub>a</sub>            | logK <sub>ow</sub> |
|--------------------|--------------------------------------------------------------------------------------------------------|---------------------------------------------------------------------------------------|----------|--------|----------------------------|--------------------|
| Sulfonamides (SAs) | Sulfamethoxazole<br>(SMX)<br>C <sub>10</sub> H <sub>11</sub> N <sub>3</sub> O <sub>3</sub> S           | 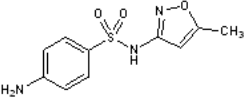   | 723-46-6 | 253.28 | 1.85 ± 0.30<br>5.60 ± 0.04 | 0.89               |
|                    | Sulfathiazole<br>(STZ)<br>C <sub>9</sub> H <sub>9</sub> N <sub>3</sub> O <sub>2</sub> S <sub>2</sub>   |     | 72-14-0  | 255.32 | 2.01 ± 0.30<br>7.11 ± 0.09 | 0.05               |
|                    | Sulfadiazine<br>(SDZ)<br>C <sub>10</sub> H <sub>10</sub> N <sub>4</sub> O <sub>2</sub> S               |    | 68-35-9  | 250.30 | 1.57 ± 0.10<br>6.50 ± 0.30 | -0.12              |
|                    | Sulfamethazine<br>(SMN)<br>C <sub>12</sub> H <sub>14</sub> N <sub>4</sub> O <sub>2</sub> S             |    | 57-68-1  | 278.33 | 2.07 ± 0.30<br>7.49 ± 0.13 | 0.80               |
|                    | Sulfamerazine<br>(SMR)<br>C <sub>11</sub> H <sub>12</sub> N <sub>4</sub> O <sub>2</sub> S              |   | 127-79-7 | 264.30 | 2.82 ± 0.31<br>6.84 ± 0.30 | 0.34               |
|                    | Sulfamethizole<br>(SML)<br>C <sub>9</sub> H <sub>10</sub> N <sub>4</sub> O <sub>2</sub> S <sub>2</sub> |  | 144-82-1 | 270.33 | 1.86 ± 0.30<br>5.29 ± 0.04 | 0.51               |
|                    | Sulfadimethoxine<br>(SDM)<br>C <sub>12</sub> H <sub>14</sub> N <sub>4</sub> O <sub>4</sub> S           |  | 122-11-2 | 310.33 | 2.13 ± 0.30<br>6.08 ± 0.09 | 1.48               |

|                        |                                                                                                       |                                                                                       |            |        |                            |                  |
|------------------------|-------------------------------------------------------------------------------------------------------|---------------------------------------------------------------------------------------|------------|--------|----------------------------|------------------|
|                        | Sulfisoxazole<br>(SFX)<br>C <sub>11</sub> H <sub>13</sub> N <sub>3</sub> O <sub>3</sub> S             | 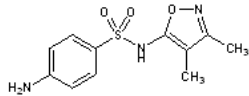   | 127-69-5   | 267.30 | 1.52 ± 0.10<br>4.83 ± 0.50 | 1.01             |
| Fluoroquinolones (FQs) | Norfloxacin<br>(NOR)<br>C <sub>16</sub> H <sub>18</sub> FN <sub>3</sub> O <sub>3</sub>                |    | 70458-96-7 | 319.33 | 3.59 ± 0.70<br>8.38 ± 0.25 | 1.48             |
|                        | Ofloxacin<br>(OFL)<br>C <sub>18</sub> H <sub>20</sub> FN <sub>3</sub> O <sub>4</sub>                  |    | 82419-36-1 | 362.15 | 2.27 ± 0.40<br>6.41 ± 0.30 | 1.41             |
|                        | Ciprofloxacin<br>(CIP)<br>C <sub>17</sub> H <sub>18</sub> FN <sub>3</sub> O <sub>3</sub>              |    | 85721-33-1 | 331.34 | 2.68 ± 0.20<br>8.38 ± 0.25 | 1.31             |
|                        | Enrofloxacin<br>(ENR)<br>C <sub>19</sub> H <sub>22</sub> FN <sub>3</sub> O <sub>3</sub>               |    | 93106-60-6 | 359.4  | 3.85 ± 0.30<br>6.19 ± 0.18 | N/A <sup>a</sup> |
|                        | Lomefloxacin<br>(LOM)<br>C <sub>17</sub> H <sub>19</sub> F <sub>2</sub> N <sub>3</sub> O <sub>3</sub> |   | 98079-51-7 | 351.35 | 5.64<br>8.47               | -0.39            |
| Macrolides (MLs)       | Tiamulin<br>(TIA)<br>C <sub>28</sub> H <sub>47</sub> NO <sub>4</sub> S                                |  | 55297-95-5 | 493.82 | 7.60                       | 6.43             |

|            |                                                                       |                                                                                       |            |        |                                    |      |
|------------|-----------------------------------------------------------------------|---------------------------------------------------------------------------------------|------------|--------|------------------------------------|------|
|            | <p>Tylosin<br/>(TYL)<br/><math>C_{46}H_{77}NO_{17}</math></p>         | 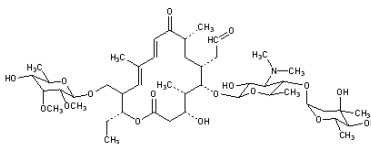   | 1401-69-0  | 916.1  | $3.31 \pm 0.30$<br>$7.50 \pm 0.13$ | N/A  |
|            | <p>Clarithromycin<br/>(CLA)<br/><math>C_{38}H_{69}NO_{13}</math></p>  |    | 81103-11-9 | 747.95 | 7.25                               | 3.16 |
|            | <p>Azithromycin<br/>(AZN)<br/><math>C_{38}H_{72}N_2O_{12}</math></p>  |    | 83905-01-5 | 748.98 | 7.34                               | 4.02 |
|            | <p>Roxithromycin<br/>(ROX)<br/><math>C_{41}H_{76}N_2O_{15}</math></p> |   | 80214-83-1 | 837.53 | $9.17 \pm 0.30$                    | 3.73 |
| β-blockers | <p>Atenolol<br/>(ATE)<br/><math>C_{14}H_{22}N_2O_3</math></p>         |  | 29122-68-7 | 266.34 | $9.17 \pm 0.38$                    | 0.10 |
|            | <p>Metoprolol<br/>(MET)<br/><math>C_{15}H_{25}NO_3</math></p>         |  | 37350-58-6 | 267.36 | $9.18 \pm 0.38$                    | 1.79 |

|                                   |                                                                                        |                                                                                     |          |        |              |       |
|-----------------------------------|----------------------------------------------------------------------------------------|-------------------------------------------------------------------------------------|----------|--------|--------------|-------|
|                                   | Propranolol<br>(PROP)<br>C <sub>16</sub> H <sub>21</sub> NO <sub>2</sub>               | 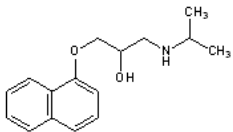 | 525-66-6 | 259.35 | 9.45 ± 0.03  | 3.10  |
| Antiepileptic                     | Carbamazepine<br>(CBZ)<br>C <sub>15</sub> H <sub>12</sub> N <sub>2</sub> O             |  | 298-46-4 | 236.27 | 13.94 ± 0.20 | 2.67  |
| Stimulant                         | Caffeine<br>(CAF)<br>C <sub>8</sub> H <sub>10</sub> N <sub>4</sub> O <sub>2</sub>      |  | 58-08-2  | 194.19 | 10.40        | -0.13 |
| Dihydrofolate reductase inhibitor | Trimethoprim<br>(TMP)<br>C <sub>14</sub> H <sub>18</sub> N <sub>4</sub> O <sub>3</sub> |  | 738-70-5 | 290.32 | 7.20 ± 0.17  | 0.79  |

a: not available

**Table S2.** Operational parameters of tandem MS and LOQs of target PPCPs in wastewater.

| Compound | Q1 (amu) | Q3 (amu) | DP (volts) | CE (volts) | Recovery (%) | LOQ <sup>a</sup> (µg/L) | LOD <sup>b</sup> (µg/L) |
|----------|----------|----------|------------|------------|--------------|-------------------------|-------------------------|
| SMR      | 264.8    | 155.9    |            | 50         | 23           | 121                     | 0.18                    |
| SMX      | 253.9    |          | 108.0      | 50         | 31           | 104                     | 0.33                    |
| SDZ      | 250.9    |          | 108.0      | 40         | 31           | 105                     | 0.36                    |
| SMN      | 279.0    |          | 186.0      | 60         | 23           | 130                     | 0.31                    |
| SML      | 270.9    |          | 156.1      | 20         | 19           | 123                     | 0.50                    |
| SFX      | 268.0    |          | 113.1      | 40         | 20           | 91                      | 0.47                    |
| SDM      | 310.9    |          | 156.0      | 20         | 19           | 83                      | 0.34                    |
| STZ      | 255.8    |          | 156.0      | 60         | 20           | 116                     | 0.47                    |
| LOM      | 352.2    |          | 265.2      | 117        | 21           | 127                     | 0.35                    |
| OLF      | 362.1    |          | 260.9      | 90         | 38           | 102                     | 0.49                    |
| ENR      | 360.2    |          | 316.0      | 30         | 27           | 72                      | 0.30                    |
| CIP      | 332.1    |          | 288.1      | 40         | 23           | 100                     | 0.29                    |
| NOR      | 320.0    |          | 233.0      | 30         | 33           | 101                     | 0.47                    |
| CLA      | 748.5    |          | 158.0      | 80         | 34           | 90                      | 0.62                    |
| ROX      | 837.4    |          | 679.4      | 20         | 31           | 116                     | 0.66                    |
| AZN      | 749.3    |          | 158.0      | 40         | 46           | 134                     | 0.26                    |
| TYL      | 916.6    |          | 772.3      | 90         | 39           | 117                     | 0.41                    |
| TIA      | 494.2    |          | 285.4      | 90         | 30           | 94                      | 0.68                    |
| CBZ      | 237.1    |          | 194.0      | 60         | 26           | 126                     | 0.25                    |
| CAF      | 195.0    |          | 138.0      | 70         | 28           | 79                      | 0.38                    |
| PROP     | 260.3    |          | 116.0      | 40         | 23           | 85                      | 0.40                    |
| MET      | 268.1    |          | 116.2      | 60         | 25           | 77                      | 0.48                    |
| ATE      | 260.0    |          | 116.3      | 52         | 25           | 81                      | 0.36                    |
| TMP      |          | 291.0    | 261.0      | 110        | 31           | 96                      | 0.47                    |

a: limits of quantification

b: limits of detection



**Table S3.** Concentrations of target PPCPs in Influent of EMBR and CMBR.

| Compound                          | Influent (ng/L) |         |         |         |   |
|-----------------------------------|-----------------|---------|---------|---------|---|
|                                   | Min             | Med     | Max     | Freq    |   |
| SAs                               |                 |         |         |         |   |
| SMR                               |                 | 29.6    | 54.9    | 219.2   | 7 |
| SMX                               |                 | 165.0   | 277.4   | 1003.2  | 7 |
| SDZ                               |                 | 149.9   | 230.9   | 709.6   | 7 |
| SMN                               |                 | 34.4    | 48.4    | 120.5   | 7 |
| SML                               |                 | 59.4    | 162.7   | 428.5   | 7 |
| SFX                               |                 | 24.6    | 35.8    | 182.9   | 7 |
| SDM                               |                 | 26.2    | 48.7    | 124.2   | 7 |
| STZ                               |                 | 116.4   | 223.1   | 977.9   | 7 |
| FQs                               |                 |         |         |         |   |
| LOM                               |                 | 102.7   | 151.0   | 748.3   | 7 |
| OLF                               |                 | 2920.5  | 3540.2  | 4294.8  | 7 |
| ENR                               |                 | 74.8    | 97.7    | 218.6   | 7 |
| CIP                               |                 | 340.4   | 400.2   | 811.6   | 7 |
| NOR                               |                 | 436.6   | 590.2   | 817.7   | 7 |
| MLs                               |                 |         |         |         |   |
| CLA                               |                 | 73.8    | 668.9   | 2874.2  | 7 |
| ROX                               |                 | 25.1    | 200.6   | 887.3   | 7 |
| AZN                               |                 | 12.2    | 209.8   | 490.5   | 7 |
| TYL                               |                 | ND      | 49.4    | 99.8    | 6 |
| TIA                               |                 | 224.4   | 262.2   | 472.7   | 7 |
| $\beta$ -blockers                 |                 |         |         |         |   |
| PROP                              |                 | ND      | 74.6    | 86.2    | 5 |
| MET                               |                 | 2199.7  | 3609.7  | 4065.6  | 7 |
| ATE                               |                 | ND      | 57.4    | 71.8    | 5 |
| Antiepileptic                     |                 |         |         |         |   |
| CBZ                               |                 | 119.7   | 145.8   | 473.3   | 7 |
| Stimulant                         |                 |         |         |         |   |
| CAF                               |                 | 12127.6 | 14633.2 | 19273.7 | 7 |
| dihydrofolate reductase inhibitor |                 |         |         |         |   |
| TMP                               |                 | 194.9   | 253.9   | 552.8   | 7 |

\*ND: Not detected.

**Table S4.** Richness and diversity estimators of the bacteria phylotypes in the two MBR systems.

| Sample          | OTU | Chao1 | Shannon | Coverage |
|-----------------|-----|-------|---------|----------|
| <b>Inoculum</b> | 913 | 1058  | 5.15    | 0.993829 |
| <b>EMBR</b>     | 964 | 1155  | 5.08    | 0.993136 |
| <b>CMBR</b>     | 853 | 1083  | 4.59    | 0.992674 |
